# Supplementary material for: Opportunity and Means: Horizontal Gene Transfer from the Human Host to a Bacterial Pathogen
Source: PubMed Central journal article supplement — mBio. 2011 Feb 15;2(1):e00005-11. doi: 10.1128/mBio.00005-11 (PMC3042738; doi:10.1128/mbio.00005-11), 2011-02-15
Supplement: mBio00005-11-st1.pdf [file mBio00005-11-st1.pdf]

## Supplemental Material

**Supplemental Table 1. *Neisseria* isolates screened for the presence of nL1.**

| Organism/Strain       | Source/Reference                          | Screen(s) <sup>a</sup>                           |
|-----------------------|-------------------------------------------|--------------------------------------------------|
| <i>N. gonorrhoeae</i> |                                           |                                                  |
| NCCP11945             | (1)                                       | B <sup>b</sup> , H <sup>c</sup> , P <sup>d</sup> |
| MS11                  | (2)                                       | B, H, P                                          |
| FA19                  | (3)                                       | B, H, P                                          |
| F62                   | (4)                                       | B                                                |
| 1291                  | (5)                                       | B, H, P                                          |
| FA6140                | (6)                                       | B, H, P                                          |
| 35/02                 | (7)                                       | B, H, P                                          |
| IN215                 | Bell Flower Clinic, Indianapolis, Indiana | H, P                                             |
| IN299                 | Bell Flower Clinic, Indianapolis, Indiana | H, P                                             |
| IN314                 | Bell Flower Clinic, Indianapolis, Indiana | H, P                                             |
| IN397                 | Bell Flower Clinic, Indianapolis, Indiana | H, P                                             |
| IN400                 | Bell Flower Clinic, Indianapolis, Indiana | H, P                                             |
| IN555                 | Bell Flower Clinic, Indianapolis, Indiana | H, P                                             |
| IN578                 | Bell Flower Clinic, Indianapolis, Indiana | H, P                                             |
| IN644                 | Bell Flower Clinic, Indianapolis, Indiana | H, P                                             |
| IN33578               | Bell Flower Clinic, Indianapolis, Indiana | H, P                                             |
| IN65463               | Bell Flower Clinic, Indianapolis, Indiana | H, P                                             |
| IN92208               | Bell Flower Clinic, Indianapolis, Indiana | H, P                                             |
| IN95029               | Bell Flower Clinic, Indianapolis, Indiana | H, P                                             |
| IN102606              | Bell Flower Clinic, Indianapolis, Indiana | H, P                                             |
| IN111734              | Bell Flower Clinic, Indianapolis, Indiana | H, P                                             |
| IN113831              | Bell Flower Clinic, Indianapolis, Indiana | H, P                                             |
| IN114758              | Bell Flower Clinic, Indianapolis, Indiana | H, P                                             |
| FA1090                | (8)                                       | B, H, P                                          |
| DGI2                  | (9)                                       | B, H, P                                          |
| DGI4                  | (9)                                       | H, P                                             |
| DGI5                  | (9)                                       | H, P                                             |
| DGI8                  | (9)                                       | H, P                                             |
| DGI10                 | (9)                                       | H, P                                             |
| DGI11                 | (9)                                       | H, P                                             |
| DGI14                 | (9)                                       | H, P                                             |
| DGI18                 | (9)                                       | B, H, P                                          |
| DGI20                 | (9)                                       | H, P                                             |
| DGI21                 | (9)                                       | H, P                                             |
| DGI24                 | (9)                                       | H, P                                             |
| DGI25                 | (9)                                       | H, P                                             |
| SK-92-679             | Neisseria Reference Laboratory            | B, H, P                                          |
| SK-93-1035            | Neisseria Reference Laboratory            | B, H, P                                          |
| PID1                  | (10)                                      | B, H, P                                          |
| PID6                  | (10)                                      | H, P                                             |
| PID8                  | (10)                                      | H, P                                             |

|                        |                                                           |         |
|------------------------|-----------------------------------------------------------|---------|
| PID18                  | (10)                                                      | B, H, P |
| PID20                  | (10)                                                      | H, P    |
| PID24                  | (10)                                                      | B, H, P |
| PID302                 | (10)                                                      | H, P    |
| PID305                 | (10)                                                      | H, P    |
| PID331                 | (10)                                                      | H, P    |
| PID332                 | (10)                                                      | B, H, P |
| PID333                 | (10)                                                      | H, P    |
| PID334                 | (10)                                                      | H, P    |
| PID335                 | (10)                                                      | H, P    |
| PID336                 | (10)                                                      | H, P    |
| WHO B                  | Centers for Disease Control and Prevention                | P       |
| WHO H                  | Centers for Disease Control and Prevention                | P       |
| WHO I                  | Centers for Disease Control and Prevention                | P       |
| WHO J                  | Centers for Disease Control and Prevention                | P       |
| CDC-10331              | Centers for Disease Control and Prevention                | P       |
| F28                    | Centers for Disease Control and Prevention                | P       |
| SPL-4                  | Centers for Disease Control and Prevention                | P       |
| 97G181                 | Centers for Disease Control and Prevention                | P       |
| ATCC 49226             | Centers for Disease Control and Prevention                | P       |
| P-681E                 | Centers for Disease Control and Prevention                | P       |
| <i>N. meningitidis</i> |                                                           |         |
| MC58                   | (11)                                                      | B, H, P |
| FAM18                  | (12)                                                      | B, H, P |
| Z2491                  | (13)                                                      | B, H, P |
| ATCC13077              | American Type Culture Collection                          | H, P    |
| ATCC13090              | American Type Culture Collection                          | H, P    |
| ATCC13102              | American Type Culture Collection                          | H, P    |
| ATCC13106              | American Type Culture Collection                          | H, P    |
| ATCC23254              | American Type Culture Collection                          | H, P    |
| WSLH B1                | Wisconsin State Laboratory of Hygiene, Madison, Wisconsin | H, P    |
| WSLH B2                | Wisconsin State Laboratory of Hygiene, Madison, Wisconsin | H, P    |
| WSLH B3                | Wisconsin State Laboratory of Hygiene, Madison, Wisconsin | H, P    |
| WSLH B4                | Wisconsin State Laboratory of Hygiene, Madison, Wisconsin | H, P    |
| WSLH B5                | Wisconsin State Laboratory of Hygiene, Madison, Wisconsin | H, P    |
| WSLH B6                | Wisconsin State Laboratory of Hygiene, Madison, Wisconsin | H, P    |
| WSLH B7                | Wisconsin State Laboratory of Hygiene, Madison, Wisconsin | H, P    |
| WSLH B8                | Wisconsin State Laboratory of Hygiene, Madison, Wisconsin | H, P    |
| WSLH B9                | Wisconsin State Laboratory of Hygiene, Madison, Wisconsin | H, P    |
| WSLH B10               | Wisconsin State Laboratory of Hygiene, Madison, Wisconsin | H, P    |
| WSLH C1                | Wisconsin State Laboratory of Hygiene, Madison, Wisconsin | H, P    |
| WSLH C2                | Wisconsin State Laboratory of Hygiene, Madison, Wisconsin | H, P    |
| WSLH C3                | Wisconsin State Laboratory of Hygiene, Madison, Wisconsin | H, P    |
| WSLH C4                | Wisconsin State Laboratory of Hygiene, Madison, Wisconsin | H, P    |
| WSLH C5                | Wisconsin State Laboratory of Hygiene, Madison, Wisconsin | H, P    |
| WSLH C6                | Wisconsin State Laboratory of Hygiene, Madison, Wisconsin | H, P    |
| WSLH C7                | Wisconsin State Laboratory of Hygiene, Madison, Wisconsin | H, P    |
| WSLH C8                | Wisconsin State Laboratory of Hygiene, Madison, Wisconsin | H, P    |

|              |                                                           |      |
|--------------|-----------------------------------------------------------|------|
| WSLH C9      | Wisconsin State Laboratory of Hygiene, Madison, Wisconsin | H, P |
| WSLH C10     | Wisconsin State Laboratory of Hygiene, Madison, Wisconsin | H, P |
| WSLH Y1      | Wisconsin State Laboratory of Hygiene, Madison, Wisconsin | H, P |
| WSLH Y2      | Wisconsin State Laboratory of Hygiene, Madison, Wisconsin | H, P |
| WSLH Y3      | Wisconsin State Laboratory of Hygiene, Madison, Wisconsin | H, P |
| WSLH Y4      | Wisconsin State Laboratory of Hygiene, Madison, Wisconsin | H, P |
| WSLH Y5      | Wisconsin State Laboratory of Hygiene, Madison, Wisconsin | H, P |
| WSLH Y6      | Wisconsin State Laboratory of Hygiene, Madison, Wisconsin | H, P |
| WSLH Y7      | Wisconsin State Laboratory of Hygiene, Madison, Wisconsin | H, P |
| WSLH Y8      | Wisconsin State Laboratory of Hygiene, Madison, Wisconsin | H, P |
| WSLH Y9      | Wisconsin State Laboratory of Hygiene, Madison, Wisconsin | H, P |
| WSLH Y10     | Wisconsin State Laboratory of Hygiene, Madison, Wisconsin | H, P |
| WSLH W-135 1 | Wisconsin State Laboratory of Hygiene, Madison, Wisconsin | H, P |
| WSLH W-135 2 | Wisconsin State Laboratory of Hygiene, Madison, Wisconsin | H, P |
| WSLH W-135 3 | Wisconsin State Laboratory of Hygiene, Madison, Wisconsin | H, P |
| WSLH W-135 4 | Wisconsin State Laboratory of Hygiene, Madison, Wisconsin | H, P |
| WSLH Z1      | Wisconsin State Laboratory of Hygiene, Madison, Wisconsin | H, P |
| WSLH Z2      | Wisconsin State Laboratory of Hygiene, Madison, Wisconsin | H, P |
| WSLH Z3      | Wisconsin State Laboratory of Hygiene, Madison, Wisconsin | H, P |
| WSLH X2      | Wisconsin State Laboratory of Hygiene, Madison, Wisconsin | H, P |
| WSLH X3      | Wisconsin State Laboratory of Hygiene, Madison, Wisconsin | H, P |
| 10           | M. Maiden, personal communication                         | B    |
| 20           | M. Maiden, personal communication                         | B    |
| 26           | M. Maiden, personal communication                         | B    |
| 106          | M. Maiden, personal communication                         | B    |
| 153          | M. Maiden, personal communication                         | B    |
| 154          | M. Maiden, personal communication                         | B    |
| 243          | M. Maiden, personal communication                         | B    |
| 243          | M. Maiden, personal communication                         | B    |
| 254          | M. Maiden, personal communication                         | B    |
| 255          | M. Maiden, personal communication                         | B    |
| 371          | M. Maiden, personal communication                         | B    |
| 393          | M. Maiden, personal communication                         | B    |
| 400          | M. Maiden, personal communication                         | B    |
| 500          | M. Maiden, personal communication                         | B    |
| 528          | M. Maiden, personal communication                         | B    |
| 690          | M. Maiden, personal communication                         | B    |
| 1000         | M. Maiden, personal communication                         | B    |
| 1014         | M. Maiden, personal communication                         | B    |
| 3906         | M. Maiden, personal communication                         | B    |
| 6748         | M. Maiden, personal communication                         | B    |
| 7891         | M. Maiden, personal communication                         | B    |
| 8680         | M. Maiden, personal communication                         | B    |
| 053442       | M. Maiden, personal communication                         | B    |
| 79126        | M. Maiden, personal communication                         | B    |
| 79128        | M. Maiden, personal communication                         | B    |
| 80049        | M. Maiden, personal communication                         | B    |
| 92001        | M. Maiden, personal communication                         | B    |

|          |                                   |   |
|----------|-----------------------------------|---|
| 860060   | M. Maiden, personal communication | B |
| 860800   | M. Maiden, personal communication | B |
| 890326   | M. Maiden, personal communication | B |
| 931905   | M. Maiden, personal communication | B |
| 2059001  | M. Maiden, personal communication | B |
| 11-004   | M. Maiden, personal communication | B |
| 120M     | M. Maiden, personal communication | B |
| 129E     | M. Maiden, personal communication | B |
| 14/1455  | M. Maiden, personal communication | B |
| 196/87   | M. Maiden, personal communication | B |
| 204/92   | M. Maiden, personal communication | B |
| 297-0    | M. Maiden, personal communication | B |
| 312 901  | M. Maiden, personal communication | B |
| 322/85   | M. Maiden, personal communication | B |
| 38VI     | M. Maiden, personal communication | B |
| 44/76    | M. Maiden, personal communication | B |
| 50/94    | M. Maiden, personal communication | B |
| 71/94    | M. Maiden, personal communication | B |
| 88/03415 | M. Maiden, personal communication | B |
| 90/18311 | M. Maiden, personal communication | B |
| 91/40    | M. Maiden, personal communication | B |
| 94/155   | M. Maiden, personal communication | B |
| A22      | M. Maiden, personal communication | B |
| A4/M1027 | M. Maiden, personal communication | B |
| AK22     | M. Maiden, personal communication | B |
| AK50     | M. Maiden, personal communication | B |
| α 14     | M. Maiden, personal communication | B |
| α 153    | M. Maiden, personal communication | B |
| α275     | M. Maiden, personal communication | B |
| B6116/77 | M. Maiden, personal communication | B |
| BRAZ10   | M. Maiden, personal communication | B |
| BZ 10    | M. Maiden, personal communication | B |
| BZ 133   | M. Maiden, personal communication | B |
| BZ 147   | M. Maiden, personal communication | B |
| BZ 163   | M. Maiden, personal communication | B |
| BZ 169   | M. Maiden, personal communication | B |
| BZ 232   | M. Maiden, personal communication | B |
| BZ 83    | M. Maiden, personal communication | B |
| BZ198    | M. Maiden, personal communication | B |
| CN100    | M. Maiden, personal communication | B |
| D1       | M. Maiden, personal communication | B |
| D8       | M. Maiden, personal communication | B |
| DK 24    | M. Maiden, personal communication | B |
| DK 353   | M. Maiden, personal communication | B |
| E26      | M. Maiden, personal communication | B |
| E32      | M. Maiden, personal communication | B |
| EG 011   | M. Maiden, personal communication | B |
| EG 327   | M. Maiden, personal communication | B |

|           |                                   |   |
|-----------|-----------------------------------|---|
| EG 328    | M. Maiden, personal communication | B |
| EG 329    | M. Maiden, personal communication | B |
| F1576     | M. Maiden, personal communication | B |
| F4698     | M. Maiden, personal communication | B |
| F6124     | M. Maiden, personal communication | B |
| G2136     | M. Maiden, personal communication | B |
| H1964     | M. Maiden, personal communication | B |
| IAL2229   | M. Maiden, personal communication | B |
| L93/4286  | M. Maiden, personal communication | B |
| M-101/93  | M. Maiden, personal communication | B |
| M40/94    | M. Maiden, personal communication | B |
| MA-5756   | M. Maiden, personal communication | B |
| N45/96    | M. Maiden, personal communication | B |
| NG 080    | M. Maiden, personal communication | B |
| NG 3/88   | M. Maiden, personal communication | B |
| NG 4/88   | M. Maiden, personal communication | B |
| NG 6/88   | M. Maiden, personal communication | B |
| NG E28    | M. Maiden, personal communication | B |
| NG E30    | M. Maiden, personal communication | B |
| NG E31    | M. Maiden, personal communication | B |
| NG F26    | M. Maiden, personal communication | B |
| NG G40    | M. Maiden, personal communication | B |
| NG H15    | M. Maiden, personal communication | B |
| NG H36    | M. Maiden, personal communication | B |
| NG H38    | M. Maiden, personal communication | B |
| NG H41    | M. Maiden, personal communication | B |
| NG P20    | M. Maiden, personal communication | B |
| NG PB24   | M. Maiden, personal communication | B |
| NG144/82  | M. Maiden, personal communication | B |
| NMBI      | M. Maiden, personal communication | B |
| OX9930141 | M. Maiden, personal communication | B |
| OX9930304 | M. Maiden, personal communication | B |
| OX9930342 | M. Maiden, personal communication | B |
| OX9930357 | M. Maiden, personal communication | B |
| OX9930486 | M. Maiden, personal communication | B |
| OX9930499 | M. Maiden, personal communication | B |
| OX9930715 | M. Maiden, personal communication | B |
| OX9930716 | M. Maiden, personal communication | B |
| OX9930765 | M. Maiden, personal communication | B |
| OX9930951 | M. Maiden, personal communication | B |
| OX9930963 | M. Maiden, personal communication | B |
| OX9930970 | M. Maiden, personal communication | B |
| OX9930996 | M. Maiden, personal communication | B |
| OX9931018 | M. Maiden, personal communication | B |
| OX9931019 | M. Maiden, personal communication | B |
| OX9931037 | M. Maiden, personal communication | B |
| OX9931039 | M. Maiden, personal communication | B |
| OX9931049 | M. Maiden, personal communication | B |

|                      |                                   |      |
|----------------------|-----------------------------------|------|
| OX9931066            | M. Maiden, personal communication | B    |
| OX9931111            | M. Maiden, personal communication | B    |
| OX9931152            | M. Maiden, personal communication | B    |
| OX9931165            | M. Maiden, personal communication | B    |
| OX9931197            | M. Maiden, personal communication | B    |
| OX9931218            | M. Maiden, personal communication | B    |
| OX9931238            | M. Maiden, personal communication | B    |
| OX9931242            | M. Maiden, personal communication | B    |
| OX9931249            | M. Maiden, personal communication | B    |
| OX9931268            | M. Maiden, personal communication | B    |
| OX9931283            | M. Maiden, personal communication | B    |
| OX9931352            | M. Maiden, personal communication | B    |
| OX9931436            | M. Maiden, personal communication | B    |
| OX9931550            | M. Maiden, personal communication | B    |
| OX9931553            | M. Maiden, personal communication | B    |
| OX9931563            | M. Maiden, personal communication | B    |
| OX9931676            | M. Maiden, personal communication | B    |
| OX9931715            | M. Maiden, personal communication | B    |
| OX9931875            | M. Maiden, personal communication | B    |
| OX9931911            | M. Maiden, personal communication | B    |
| OX9931966            | M. Maiden, personal communication | B    |
| OX9931967            | M. Maiden, personal communication | B    |
| OX9931990            | M. Maiden, personal communication | B    |
| OX9932015            | M. Maiden, personal communication | B    |
| OX9932020            | M. Maiden, personal communication | B    |
| OX9932077            | M. Maiden, personal communication | B    |
| OX9932088            | M. Maiden, personal communication | B    |
| OX9932093            | M. Maiden, personal communication | B    |
| OX9932099            | M. Maiden, personal communication | B    |
| OX9932142            | M. Maiden, personal communication | B    |
| OX9932180            | M. Maiden, personal communication | B    |
| OX9932316            | M. Maiden, personal communication | B    |
| OX9932386            | M. Maiden, personal communication | B    |
| OX9932389            | M. Maiden, personal communication | B    |
| OX9932412            | M. Maiden, personal communication | B    |
| S3131                | M. Maiden, personal communication | B    |
| S4355                | M. Maiden, personal communication | B    |
| S5611                | M. Maiden, personal communication | B    |
| SB25                 | M. Maiden, personal communication | B    |
| SWZ107               | M. Maiden, personal communication | B    |
| Z7174                | M. Maiden, personal communication | B    |
| Z814                 | M. Maiden, personal communication | B    |
| <i>N. cinerea</i>    |                                   |      |
| ATCC14685            | M. Maiden, personal communication | B    |
| <i>N. elongata</i>   |                                   |      |
| ATCC29315            | M. Maiden, personal communication | B    |
| <i>N. flavescens</i> |                                   |      |
| ATCC13115            | American Type Culture Collection  | H, P |

|                         |                                    |         |
|-------------------------|------------------------------------|---------|
| ATCC13117               | American Type Culture Collection   | H, P    |
| ATCC13120               | American Type Culture Collection   | H, P    |
| NRL30031                | M. Maiden, personal communication  | B       |
| SK114                   | M. Maiden, personal communication  | B       |
| <i>N. lactamica</i>     |                                    |         |
| ATCC23970               | American Type Culture Collection   | B, H, P |
| 020-06                  | M. Maiden, personal communication  | B       |
| <i>N. mucosa</i>        |                                    |         |
| NRL-9300                | Neisseria Reference Laboratory     | H, P    |
| ATCC19696               | American Type Culture Collection   | H, P    |
| ATCC25996               | American Type Culture Collection   | B, H, P |
| <i>N. polysaccharea</i> |                                    |         |
| ATCC43768               | M. Maiden, personal communication  | B       |
| <i>N. sicca</i>         |                                    |         |
| ATCC9913                | American Type Culture Collection   | H, P    |
| ATCC29256               | M. Maiden, personal communication  | B       |
| <i>N. subflava</i>      |                                    |         |
| ATCC10555               | American Type Culture Collection   | H, P    |
| ATCC14799               | American Type Culture Collection   | H, P    |
| ATCC49275               | American Type Culture Collection   | H, P    |
| NJ9703                  | M. Maiden , personal communication | B       |

---

a, Screening method used to detect nL1

b, BLAST

c, DNA hybridization

d, PCR

## Supplemental References

1. **Chung, G. T., J. S. Yoo, H. B. Oh, Y. S. Lee, S. H. Cha, S. J. Kim, and C. K. Yoo.** 2008. Complete genome sequence of *Neisseria gonorrhoeae* NCCP11945. *J. Bacteriol.* **190**:6035-6036.
2. **Swanson, J., S. Bergstrom, J. Boslego, and M. Koomey.** 1987. Gene conversion accounts for pilin structural changes and for reversible piliation "phase" changes in gonococci. *Antonie Van Leeuwenhoek* **53**:441-446.
3. **Maness, M. J., and P. F. Sparling.** 1973. Multiple antibiotic resistance due to a single mutation in *Neisseria gonorrhoeae*. *J. Infect. Dis.* **128**:321-330.
4. **Schneider, H., J. M. Griffiss, G. D. Williams, and G. B. Pier.** 1982. Immunological basis of serum resistance of *Neisseria gonorrhoeae*. *J. Gen. Microbiol.* **128**:13-22.
5. **Apicella, M. A.** 1974. Antigenically distinct populations of *Neisseria gonorrhoeae*: isolation and characterization of the responsible determinants. *J. Infect. Dis.* **130**:619-625.
6. **Faruki, H., and P. F. Sparling.** 1986. Genetics of resistance in a non-beta-lactamase-producing gonococcus with relatively high-level penicillin resistance. *Antimicrob. Agents Chemother.* **30**:856-860.
7. **Lindberg, R., H. Fredlund, R. Nicholas, and M. Unemo.** 2007. *Neisseria gonorrhoeae* isolates with reduced susceptibility to cefixime and ceftriaxone: association with genetic polymorphisms in *penA*, *mtrR*, *porB1b*, and *ponA*. *Antimicrob. Agents Chemother.* **51**:2117-2122.
8. **Nachamkin, I., J. G. Cannon, and R. S. Mittler.** 1981. Monoclonal antibodies against *Neisseria gonorrhoeae*: production of antibodies directed against a strain-specific cell surface antigen. *Infect. Immun.* **32**:641-648.
9. **O'Brien, J. P., D. L. Goldenberg, and P. A. Rice.** 1983. Disseminated gonococcal infection: a prospective analysis of 49 patients and a review of pathophysiology and immune mechanisms. *Medicine (Baltimore)* **62**:395-406.
10. **Kasper, D. L., P. A. Rice, and W. M. McCormick.** 1977. Bactericidal antibody in genital infection due to *Neisseria gonorrhoeae*. *J. Infect. Dis.* **135**:243-251.
11. **McGuinness, B. T., I. N. Clarke, P. R. Lambden, A. K. Barlow, J. T. Poolman, D. M. Jones, and J. E. Heckels.** 1991. Point mutation in meningococcal *porA* gene associated with increased endemic disease. *Lancet* **337**:514-517.
12. **Kawula, T. H., E. L. Aho, D. S. Barritt, D. G. Klapper, and J. G. Cannon.** 1988. Reversible phase variation of expression of *Neisseria meningitidis* class 5 outer membrane proteins and their relationship to gonococcal proteins II. *Infect. Immun.* **56**:380-386.
13. **Dempsey, J. A., A. B. Wallace, and J. G. Cannon.** 1995. The physical map of the chromosome of a serogroup A strain of *Neisseria meningitidis* shows complex rearrangements relative to the chromosomes of the two mapped strains of the closely related species *N. gonorrhoeae*. *J. Bacteriol.* **177**:6390-6400.
