# Supplementary material for: Opportunity and Means: Horizontal Gene Transfer from the Human Host to a Bacterial Pathogen
Source: PubMed Central journal article supplement — mBio. 2011 Feb 15;2(1):e00005-11. doi: 10.1128/mBio.00005-11 (PMC3042738; doi:10.1128/mbio.00005-11), 2011-02-15
Supplement: mBio00005-11-st2.pdf [file mBio00005-11-st2.pdf]

**Supplemental Table 2. Oligonucleotides used in this study.**

| Name      | Sequence (5'→3')         | Purpose               |
|-----------|--------------------------|-----------------------|
| LINEfor   | TCCCTTCTCGCTTCATTTCAATTC | nL1 genotyping/RT-PCR |
| LINErev   | TCACACGGCAGGGTATTCCAACAG | nL1 genotyping/RT-PCR |
| L1for     | CACCAGCAACAGAACAAAGCTGGA | nL1 genotyping/RT-PCR |
| L1rev     | TGCCTTTGGTTTGAATGTCCTCCC | nL1 genotyping/RT-PCR |
| IS1106for | TGGCTAAATTCACATAACATCAAG | nL1 genotyping        |
| IRGrev    | ATAATAGTTTCCCGTTGCCTCCAT | nL1 genotyping        |
| abcZMA1   | TTGTCGAAGAGGCGGTTGTGTT   | MLST                  |
| abcZMA2   | ACGACGGGCAGATTATTGTTCA   | MLST                  |
| adkMA1    | CACTCAGGCGCAATTCATCACC   | MLST                  |
| adkMA2    | CCCAATACTTCGGCTTTCACAG   | MLST                  |
| aroEMA1   | ACGCTGGTGTGGTTGGAAGACG   | MLST                  |
| aroEMA2   | CGGCGCGGTAGGTAATGATGTT   | MLST                  |
| fumCMA1   | CGCCCGTCAGCAAGCCCAACC    | MLST                  |
| fumCMA2   | GAAATAGCCGCCGCCAAACTCG   | MLST                  |
| gdhMA1    | GTAAAGGCGGACGGATTCATTC   | MLST                  |
| gdhMA2    | CTGGGTACGGATTTGGCTTCTT   | MLST                  |
| pdhCMA1   | GGTCTGCGCCGTATGTATGC     | MLST                  |
| pdhCMA2   | GCTTTGATGCCGTATTTCTC     | MLST                  |
| pgmMA1    | TTCAAACGCAACACCAAATC     | MLST                  |
| pgmMA2    | TGCCGGCAAACCTACAAAG      | MLST                  |
